# Supplementary material for: A GIS and statistical approach to identify variables that control water quality in hydrothermally altered and mineralized watersheds, Silverton, Colorado, USA
Source: Springer Nature journal article supplement (doi:10.1007/s12665-013-2229-y), 2013-02-11
Supplement: MOESM2 [file 12665_2013_2229_MOESM2_ESM.docx]

Table 2. Vegetation cover and morphometric parameters (total area; m2, drainage density, stream length) for Mineral Creek, Cement Creek, and Animas River basin watersheds. N.A. indicates that no AVIRIS coverage was available to map vegetation.

| **Basin** | **Watershed** | **Total area** | **Drainage density** | **Stream length** | **Vegetated area** | **Non-vegetated area** | **Vegetated area %** | **Non-vegetated area %** |
| --- | --- | --- | --- | --- | --- | --- | --- | --- |
| **Mineral Creek** | **Northeast of Belcher Mine** | 1752000 | 0.0041 | 7131 | 721200 | 1030800 | 41 | 58 |
|  | **Zuni Gulch** | 1378300 | 0.0032 | 4376 | 349400 | 1028900 | 25 | 75 |
|  | **Battle Ship Slide** | 827300 | 0.0053 | 4376 | 157900 | 669400 | 19 | 81 |
|  | **Red Tributary** | 3045600 | 0.0008 | 2408 | 1859200 | 1186400 | 61 | 39 |
|  | **South of Bonner Mine** | 616000 | 0.0008 | 493 | 36800 | 579200 | 6 | 94 |
|  |  |  |  |  |  |  |  |  |
|  | **Middle Fork Mineral Creek-East Basin** | 478400 | 0.0067 | 3197 | 398700 | 79700 | 83 | 17 |
|  |  |  |  |  |  |  |  |  |
|  | **Middle Fork Mineral Creek-Central Basin** | 493800 | 0.0028 | 1381 | 154700 | 339200 | 31 | 69 |
|  |  |  |  |  |  |  |  |  |
|  | **Middle Fork Mineral Creek-West Basin** | 1170300 | 0.0047 | 5546 | 456600 | 713700 | 39 | 61 |
|  |  |  |  |  |  |  |  |  |
|  | **Paradise Basin** | 2995400 | 0.0021 | 6176 | N.A. | N.A. | N.A. | N.A. |
|  |  |  |  |  |  |  |  |  |
|  | **South of Browns Gulch** | 2721800 | 0.0027 | 7450 | 926500 | 1795300 | 34 | 66 |
|  |  |  |  |  |  |  |  |  |
|  | **West of Imogene Mine** | 2267300 | 0.0008 | 1914 | 526200 | 1741100 | 23 | 77 |
|  |  |  |  |  |  |  |  |  |
|  | **Southeast of Chattanooga** | 834400 | 0.0053 | 4442 | 218900 | 615500 | 26 | 74 |
|  |  |  |  |  |  |  |  |  |
|  | **Big Horn Gulch** | 402900 | 0.0021 | 861 | 80600 | 322300 | 20 | 80 |
|  |  |  |  |  |  |  |  |  |
|  | **East of Carbon Lake** | 816600 | 0.0023 | 1874 | 91800 | 724800 | 11 | 89 |
| **Basin** | **Watershed** | **Total area** | **Drainage density** | **Stream length** | **Vegetated area** | **Non-vegetated area** | **Vegetated area %** | **Non-vegetated area %** |
| **Cement Creek** | **Dry Gulch** | 1980400 | 0.0035 | 7012 | 1160500 | 819900 | 59 | 41 |
|  |  |  |  |  |  |  |  |  |
|  | **South of Dry Gulch** | 131600 | 0.0000 | 800 | 8000 | 123600 | 6 | 94 |
|  |  |  |  |  |  |  |  |  |
|  | **Prospect Gulch** | 3295000 | 0.0026 | 8435 | 1403200 | 1891800 | 43 | 57 |
|  |  |  |  |  |  |  |  |  |
|  | **Tiger Gulch** | 700100 | 0.0027 | 1913 | 126200 | 573900 | 18 | 82 |
|  |  |  |  |  |  |  |  |  |
|  | **Georgia Gulch** | 1304300 | 0.0026 | 3363 | 560500 | 743800 | 43 | 57 |
|  |  |  |  |  |  |  |  |  |
|  | **Fairview Gulch** | 819300 | 0.0045 | 3689 | 216800 | 602500 | 26 | 74 |
|  |  |  |  |  |  |  |  |  |
|  | **Cascade Gulch** | 1471900 | 0.0053 | 7831 | 487900 | 984000 | 33 | 67 |

Table 2 continued.

| **Basin** | **Watershed** | **Total area** | **Drainage density** | **Stream length** | **Vegetated area** | **Non-vegetated area** | **Vegetated area %** | **Non-vegetated area %** |
| --- | --- | --- | --- | --- | --- | --- | --- | --- |
| **Cement Creek** | **Porcupine Gulch** | 793500 | 0.0010 | 822 | 248300 | 545200 | 31 | 69 |
|  |  |  |  |  |  |  |  |  |
|  | **Ohio Gulch** | 1244900 | 0.0032 | 3992 | 619800 | 625100 | 50 | 50 |
|  |  |  |  |  |  |  |  |  |
|  | **Illinois Gulch** | 784500 | 0.0028 | 2174 | 121800 | 662700 | 16 | 84 |
|  |  |  |  |  |  |  |  |  |
|  | **Topeka Gulch** | 1291300 | 0.0037 | 4783 | 451400 | 839900 | 35 | 65 |
|  |  |  |  |  |  |  |  |  |
|  | **Niagara Gulch** | 2185300 | 0.0039 | 8473 | 639400 | 1545900 | 29 | 71 |
|  |  |  |  |  |  |  |  |  |
|  | **Hancock Gulch** | 1797300 | 0.0023 | 4156 | 374200 | 1423100 | 21 | 79 |
|  |  |  |  |  |  |  |  |  |
|  | **Minnesota Gulch** | 1678200 | 0.0037 | 6164 | 451900 | 1226300 | 27 | 73 |
|  |  |  |  |  |  |  |  |  |
|  | **South Fork Cement Creek (above M. Fork)** | 4157900 | 0.0017 | 7181 | 1829200 | 2328700 | 44 | 56 |
|  |  |  |  |  |  |  |  |  |
|  | **North Fork Cement Creek** | 1198700 | 0.0046 | 5466 | 585400 | 613300 | 49 | 51 |
|  |  |  |  |  |  |  |  |  |
|  | **Ross basin** | 1605500 | 0.0030 | 4810 | 702800 | 902700 | 44 | 56 |
| **Basin** | **Watershed** | **Total area** | **Drainage density** | **Stream length** | **Vegetated area** | **Non-vegetated area** | **Vegetated area %** | **Non-vegetated area %** |
| **Upper Animas River** | **Boulder Gulch** | 6770200 | 0.0003 | 2309 | 2140500 | 4629700 | 32 | 68 |
|  | **Arrastra Creek** | 10387000 | 0.0004 | 4221 | 3989900 | 6397100 | 38 | 62 |
|  |  |  |  |  |  |  |  |  |
|  | **Hematite Gulch** | 2380700 | 0.0021 | 5026 | 821700 | 1559000 | 34 | 65 |
|  |  |  |  |  |  |  |  |  |
|  | **California Gulch** | 4968700 | 0.0018 | 9160 | 2023700 | 2945000 | 41 | 59 |
|  |  |  |  |  |  |  |  |  |
|  | **Blair Gulch** | 1563000 | 0.0124 | 19420 | 669700 | 893300 | 43 | 57 |
|  |  |  |  |  |  |  |  |  |
|  | **Niagra Gulch (upper Animas)** | 2518900 | 0.0157 | 39494 | N.A. | N.A. | N.A. | N.A. |
|  |  |  |  |  |  |  |  |  |
|  | **Swansea Gulch** | 2130500 | 0.0030 | 6328 | 984500 | 1146000 | 46 | 54 |
|  |  |  |  |  |  |  |  |  |
|  | **Eureka Gulch** | 19357000 | 0.0017 | 33297 | 6307400 | 13049600 | 33 | 67 |
|  |  |  |  |  |  |  |  |  |
|  | **Picayune Gulch** | 4181000 | 0.0009 | 3818 | 1047400 | 3133600 | 25 | 75 |
|  |  |  |  |  |  |  |  |  |
|  | **Placer Gulch** | 4804700 | 0.0011 | 5405 | 1922000 | 2882700 | 40 | 60 |
