# Supplementary material for: A GIS and statistical approach to identify variables that control water quality in hydrothermally altered and mineralized watersheds, Silverton, Colorado, USA
Source: Springer Nature journal article supplement (doi:10.1007/s12665-013-2229-y), 2013-02-11
Supplement: MOESM6 [file 12665_2013_2229_MOESM6_ESM.docx]

Table 6. Six factor principal components model with rotated factor loadings, communalities, and variance for alteration types mapped by AVIRIS and watershed water quality parameters.

| Variable | Factor 1 | Factor 2 | Factor 3 | Factor 4 | Factor 5 | Factor 6 | Communality | |
| --- | --- | --- | --- | --- | --- | --- | --- | --- |
| Drainage density | 0.113 | -0.231 | 0.087 | -0.309 | -0.125 | 0.807 | 0.836 |
| Stream length | 0.108 | 0.814 | -0.071 | -0.222 | -0.036 | 0.341 | 0.847 |
| Total watershed area | 0.073 | 0.973 | -0.052 | 0.057 | 0.004 | -0.144 | 0.979 |
| prop | 0.090 | 0.965 | -0.005 | 0.062 | -0.003 | -0.132 | 0.960 |
| arg | -0.800 | -0.063 | -0.171 | -0.131 | -0.063 | 0.018 | 0.695 |
| wsp-prop | 0.125 | 0.009 | 0.071 | 0.053 | 0.583 | -0.289 | 0.447 |
| qsp | -0.686 | -0.022 | -0.674 | -0.078 | -0.045 | -0.033 | 0.935 |
| qap | -0.963 | -0.071 | 0.008 | -0.056 | -0.032 | 0.022 | 0.938 |
| ∑(qsp+qap) | -0.781 | -0.034 | -0.566 | -0.078 | -0.045 | -0.023 | 0.940 |
| qsp-wsp | 0.052 | 0.058 | -0.886 | -0.032 | -0.035 | -0.052 | 0.796 |
| wsp-hp | -0.013 | 0.036 | -0.539 | 0.255 | 0.147 | -0.073 | 0.384 |
| wsp | 0.026 | 0.643 | 0.195 | 0.118 | 0.162 | 0.097 | 0.501 |
| wsp-hyd | 0.007 | -0.108 | 0.092 | 0.293 | 0.124 | 0.650 | 0.544 |
| ∑(Area of non-prop) | -0.367 | 0.551 | -0.465 | 0.159 | 0.407 | -0.034 | 0.847 |
| Ratio (prop:non-prop) | 0.063 | -0.102 | 0.101 | 0.152 | -0.656 | -0.219 | 0.527 |
| Vegetated area | 0.057 | 0.952 | -0.121 | 0.067 | 0.060 | 0.128 | 0.949 |
| Non-vegetated area | 0.080 | 0.970 | -0.015 | 0.051 | -0.024 | -0.149 | 0.973 |
| Undifferentiated Quaternary | 0.140 | 0.918 | -0.090 | 0.011 | -0.095 | -0.156 | 0.903 |
| Al | -0.903 | -0.085 | -0.028 | -0.302 | 0.084 | -0.047 | 0.923 |
| Cu | -0.839 | -0.065 | -0.037 | 0.114 | 0.151 | 0.022 | 0.746 |
| Fe | -0.833 | -0.108 | 0.084 | -0.323 | 0.132 | -0.089 | 0.842 |
| pH | 0.666 | 0.148 | 0.201 | 0.356 | -0.405 | 0.097 | 0.807 |
| SO4 | -0.474 | -0.108 | -0.003 | -0.814 | 0.147 | 0.027 | 0.921 |
| Specific conductance | -0.563 | -0.095 | 0.038 | -0.778 | 0.106 | -0.024 | 0.943 |
| Zn | -0.285 | 0.033 | -0.744 | -0.231 | 0.275 | -0.006 | 0.765 |
| Alkalinity | 0.316 | 0.044 | 0.286 | 0.061 | -0.808 | -0.061 | 0.844 |
| Variance | 6.2531 | 6.1067 | 2.8827 | 2.0681 | 2.0127 | 1.4679 |  |
| % variance | 0.241 | 0.235 | 0.111 | 0.080 | 0.077 | 0.056 |  |
|  |  |  |  |  |  |  |  |
